# Supplementary material
Source: HighWire-hosted journal article supplement (https://www.cmaj.ca/highwire/filestream/58503/field_highwire_adjunct_files/0/protect-hutt.pdf)
Supplement: protect-hutt.pdf [file protect-hutt.pdf]

**Appendix:** This indemnification agreement is provided as a sample form with the permission of the Izaak Walton Killam Health Centre. It does not constitute legal advice. Independent legal advice should be sought when entering into an indemnification agreement.

## INDEMNIFICATION AGREEMENT

**TO: Committee Member's Name**

WHEREAS from time to time individuals are appointed to or are asked to provide advice, assistance and support to the Izaak Walton Killam Health Centre Research Ethics Board, the Izaak Walton Killam Health Centre Ethics Committee, and the Izaak Walton Killam Health Centre Working Group on Research and Privacy Issues and other boards, committees and working groups at the Izaak Walton Killam Health Centre (each of which is referred to herein as a “Board”).

NOW THEREFORE, in consideration of your providing advice, assistance and support to one or more Boards from time to time, the Izaak Walton Killam Health Centre hereby agrees to indemnify and save you harmless from and against any and all losses, costs, charges, damages, liabilities, judgments, claims, demands, causes of action, contracts, suits, actions or other proceedings of any kind or nature and expenses (including legal fees and associated expenses) [all of which are hereinafter referred to collectively as "Claims and Expenses") whatsoever which you sustain or incur in or about any action, suit, proceeding or hearing of any nature which is brought, commenced or prosecuted against you for or in respect of any act, deed, matter or thing whatsoever, made, done or permitted by you, in or about the execution or intended execution honestly and in good faith of your duties as a member of any Board or at the request of any Board, whether or not you were officially appointed as a member of such Board by the Izaak Walton Killam Health Centre, for the period commencing \_\_\_\_\_, but excluding always any Claims or Expenses occasioned by your gross negligence or wilful neglect.

This agreement shall endure for your benefit and for the benefit of your heirs, executors, administrators or other legal representatives and their successors and assigns and shall be binding upon the Izaak Walton Killam Health Centre and its successors and assigns.

Dated at Halifax this            day of            , 2006

Izaak Walton Killam Health Centre

By: \_\_\_\_\_  
[Insert Office]

By: \_\_\_\_\_  
[Insert Office]
